# Supplementary material
Source: PubMed Central journal article supplement (PMC3461275)
Supplement: NIHMS324477-supplement-supplement_1.pdf [file NIHMS324477-supplement-supplement_1.pdf]

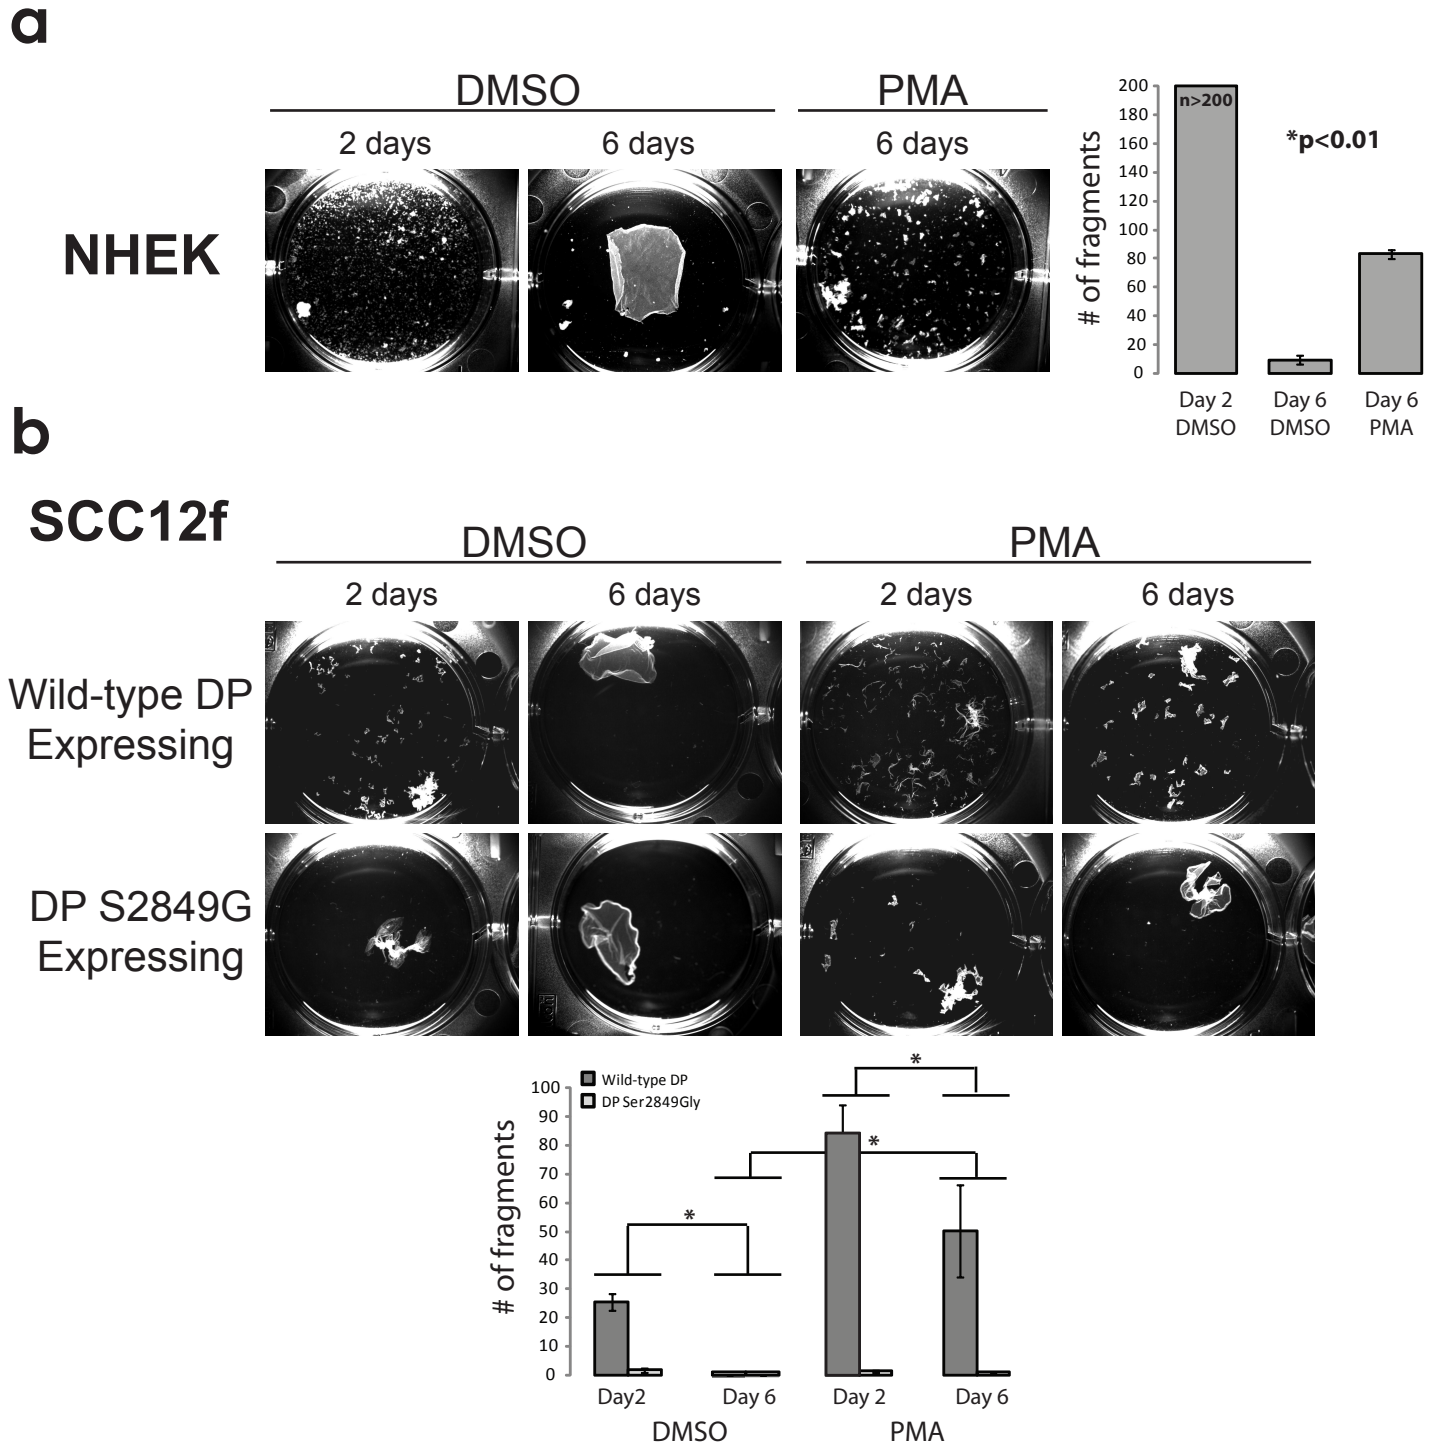

**Supplemental Figure 1: Normal human epidermal keratinocytes (NHEKs) and SCC12f cells become hyperadhesive over time.** (A) NHEKs exhibit reduced fragmentation at day 6 compared to day 2. PMA stimulation induces greater fragmentation of day 6 NHEK sheets. Graph represents quantification of fragments under each condition. Bars = mean +/- SEM. \* $p < 0.01$  for interaction across all three conditions using single factor ANOVA. (B) SCC12f cells constitutively expressing wild-type DP become hyperadhesive over 6 days, compared to 2 days at confluency. 1  $\mu$ M PMA treatment for 15 minutes induces fragmentation compared to DMSO treated controls. Cells expressing the DP Ser2849Gly point mutant exhibit enhanced resistance to mechanical stress at day 2 and are unresponsive to PMA stimulation. Graph represents quantification of fragments under each condition. Bars = mean +/- SEM. \* $p < 0.01$  using Bonferroni corrected two factor ANOVA with replication ( $\alpha = 0.0125$ ).
